# Supplementary material for: In vitro reconstitution of Escherichia coli divisome activation
Source: PubMed Central journal article supplement (PMC9098913; doi:10.1038/s41467-022-30301-y), 2022-05-12
Supplement: 41467_2022_30301_MOESM1_ESM.pdf [file 41467_2022_30301_MOESM1_ESM.pdf]

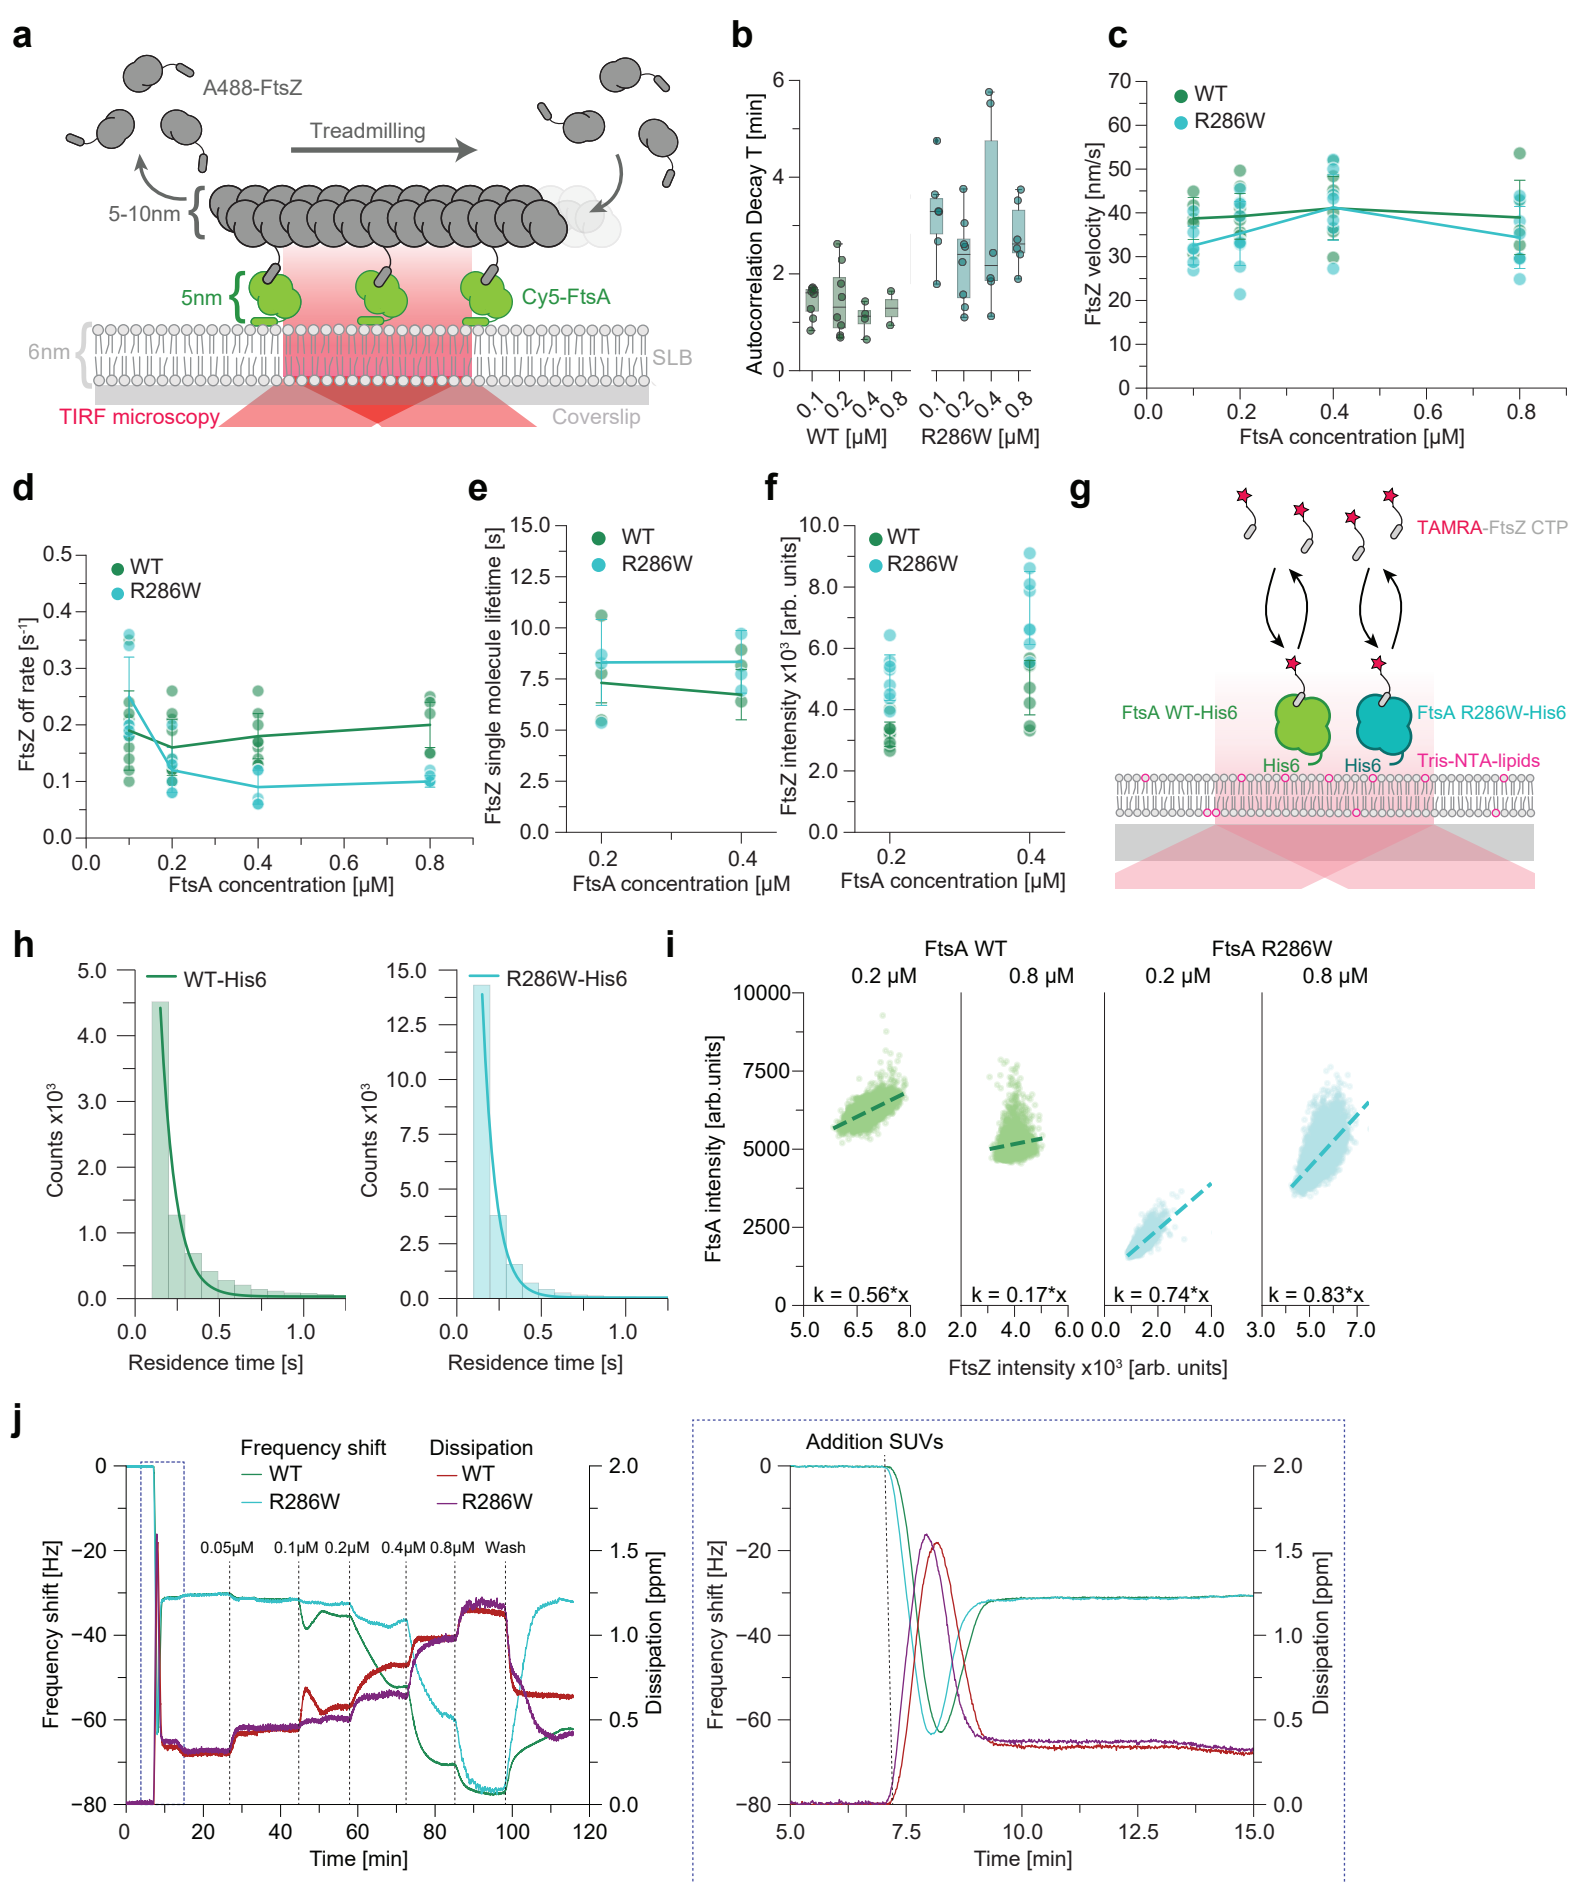

**Figure S1: FtsZ dynamics are identical with FtsA WT and R286W, but more FtsZ is recruited by FtsA R286W**

**a**, Schematic depicting the experiment setup and the corresponding dimensions of the proteins. **b**, The persistency of the FtsZ pattern is lower with FtsA WT compared to R286W at all tested concentrations, indicated by higher autocorrelation decay  $\tau$ .  $n(\text{WT}) = 8/8/4/2$  and  $n(\text{R286W}) = 6/8/6/6$  for increasing FtsA concentrations. **c**, FtsZ treadmilling velocity is identical with FtsA WT or R286W. **d**, At lower FtsA concentrations, the off-rate of FtsZ is similar to FtsA WT and R286W. At  $0.8 \mu\text{M}$ , FtsZ remains bound longer with R286W. The number of independent biological replicates for **c**, **d** are  $n=5/9/7/5$  for increasing FtsA concentrations. **e**, Single molecule lifetimes of FtsZ are similar at  $0.2 \mu\text{M}$  and  $0.4 \mu\text{M}$  FtsA ( $n=3$ ). **f**, Intensity of membrane bound FtsZ is higher in the presence of FtsA R286W ( $n=8$  for each concentration and protein). **g**, Scheme of TIRF experiment to measure the lifetime of the TAMRA labelled FtsZ-C-terminal-peptide. **h**, Representative histograms of the FtsZ CTP lifetime distribution with FtsA-His6 and R286W-His6. **i**, Scatter plots of FtsA WT (green) and R286W (cyan) intensities against FtsZ intensities from colocalization analysis at  $0.2$  and  $0.8 \mu\text{M}$ . The steepness of the slope is consistently high for FtsA R286W but decreases drastically for FtsA WT at  $0.8 \mu\text{M}$ . The plots are representative experiments, performed on the same day to ensure comparable intensity values. **j**, Representative curves from QCM-D experiments showing changes in resonance frequency during the sequential addition of increasing concentrations of FtsA. At  $0.8 \mu\text{M}$  the frequency change (=membrane binding) is identical between FtsA WT (green) and R286W (cyan). R286W can be washed easily from the membrane, whereas WT remains bound to the membrane. The zoom-in on the right side shows the initial stages of the QCM-D experiment and the formation of a SLB. Dots in all plots (except **S1i**) represent independent experiments, thick lines indicate the mean and error bars depict the standard deviation. The boxes indicate the 25–75th percentiles, whiskers show the maximum/minimum values within the standard deviation, the midline indicates the median value and diamonds indicate outliers. Source data are provided as a Source Data file.

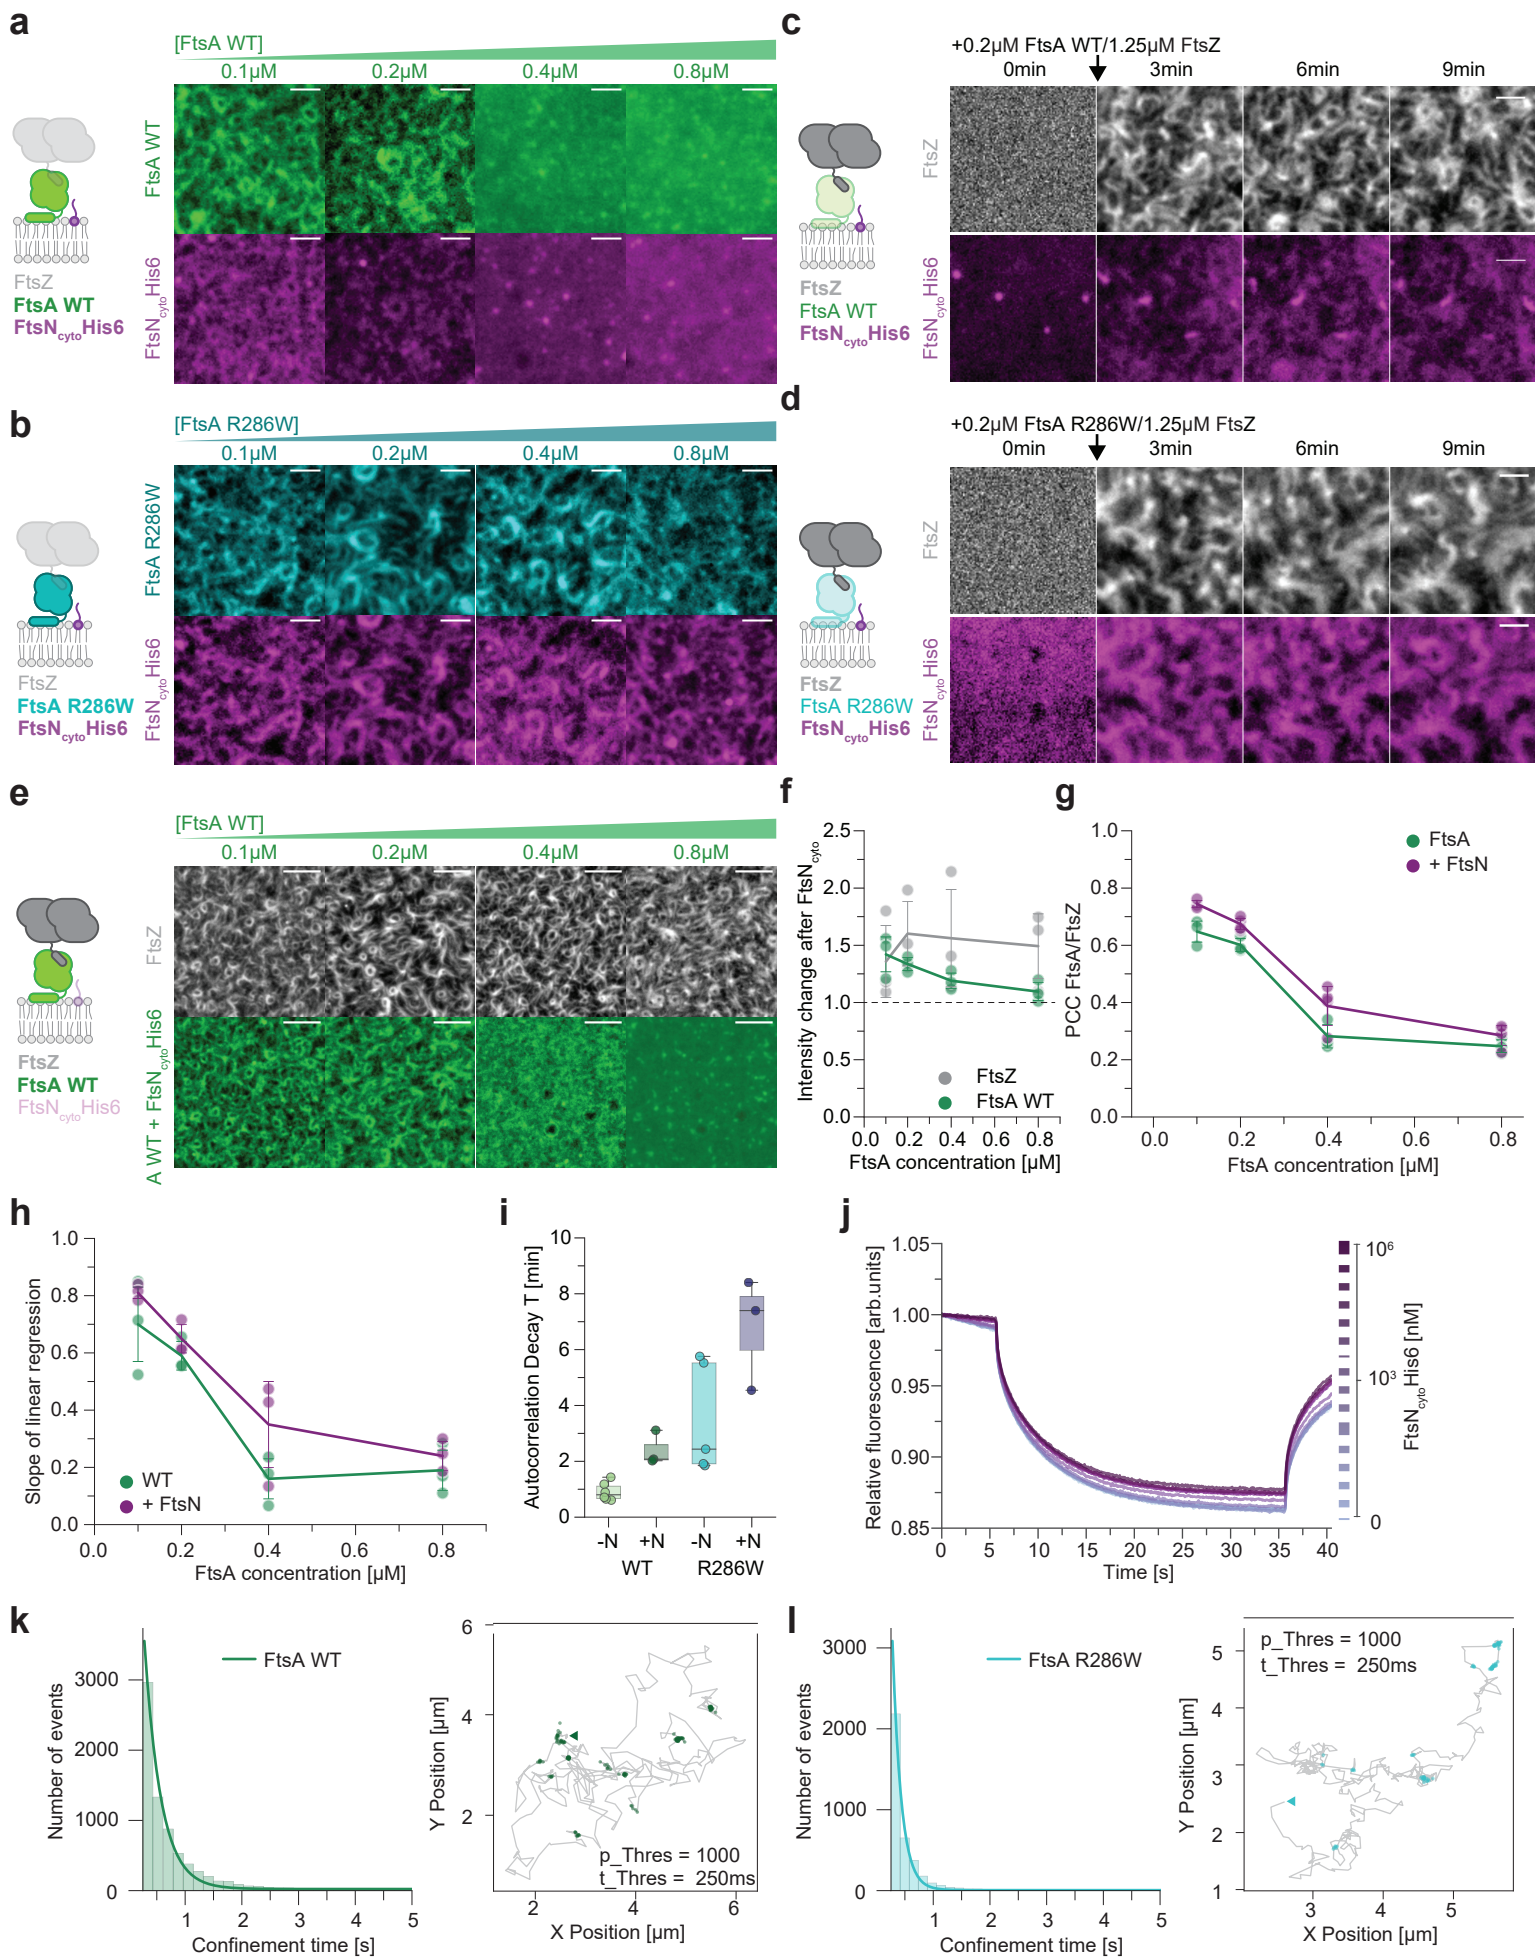

**Figure S2: FtsN<sub>cyto</sub> follows FtsA R286W co-filaments better than FtsA WT**

**a/b**, Representative micrographs of Cy3-FtsA WT (green) and Cy5-FtsN<sub>cyto</sub> (magenta) (**a**) or Cy3-FtsA R286W (cyan) and Cy5-FtsN<sub>cyto</sub> (magenta) (**b**) at increasing FtsA concentrations with FtsZ and 0.25% Tris-NTA-lipids. **c/d**, Starting from a homogeneous distribution, Cy5-FtsN<sub>cyto</sub> (magenta) colocalizes with FtsZ filaments on the membrane after the addition of Alexa488-FtsZ (grey) and 0.2 μM FtsA WT (**c**) or 0.2 μM FtsA R286W (**d**) at 0 min. Schematics on the left side of **a-d** indicate all components present in the assay and bold labels indicate fluorescent components. Scale bars are 2 μm. **e**, Representative micrographs of Cy5-FtsA WT (green) and Alexa488-FtsZ (grey) with FtsN<sub>cyto</sub>. Scale bars are 5 μm. **f**, FtsN<sub>cyto</sub> increases the amount of recruited FtsZ, whereas the amount of membrane-bound FtsA changes only slightly above 0.2 μM. **g**, Colocalization of FtsA/FtsZ quantified by PCC shows that colocalization is slightly increased with FtsN<sub>cyto</sub>. **h**, The slope of the linear regression indicates the [FtsZ] vs. [FtsA] ratio. With FtsN<sub>cyto</sub>, the slope for FtsA WT increases slightly. The measurements in **f-h** were replicated three times. **i**, FtsN<sub>cyto</sub> increases the persistency of the FtsZ pattern indicated by an increase in the autocorrelation decay time  $\tau$ .  $n(\text{WT}) = 6$ ,  $n(\text{WT}+\text{FtsN}) = 3$ ,  $n(\text{R286W})=5$ ,  $n(\text{R286W}+\text{FtsN})=3$  **j**, Representative MST traces for a titration of FtsN<sub>cyto</sub> to 50nM Cy5-FtsA WT. MST measurements were repeated three times for WT and R286W. **k, l**, Histogram of FtsN<sub>cyto</sub> confinement times to co-filaments of FtsZ and FtsA WT (**k**) or FtsA R286W (**l**). Representative tracks containing FtsN<sub>cyto</sub> confinement events in the presence of FtsA WT (green) and R286W (cyan) are shown next to the histograms. Arrowheads indicate the beginning of the tracks. Insets indicate the filters for the analysis. Dots in all plots represent independent experiments, thick lines indicate the mean and error bars depict the standard deviation. The boxes indicate the 25–75th percentiles, whiskers show the maximum/minimum values within the standard deviation and the midline indicates the median value. Source data are provided as a Source Data file.

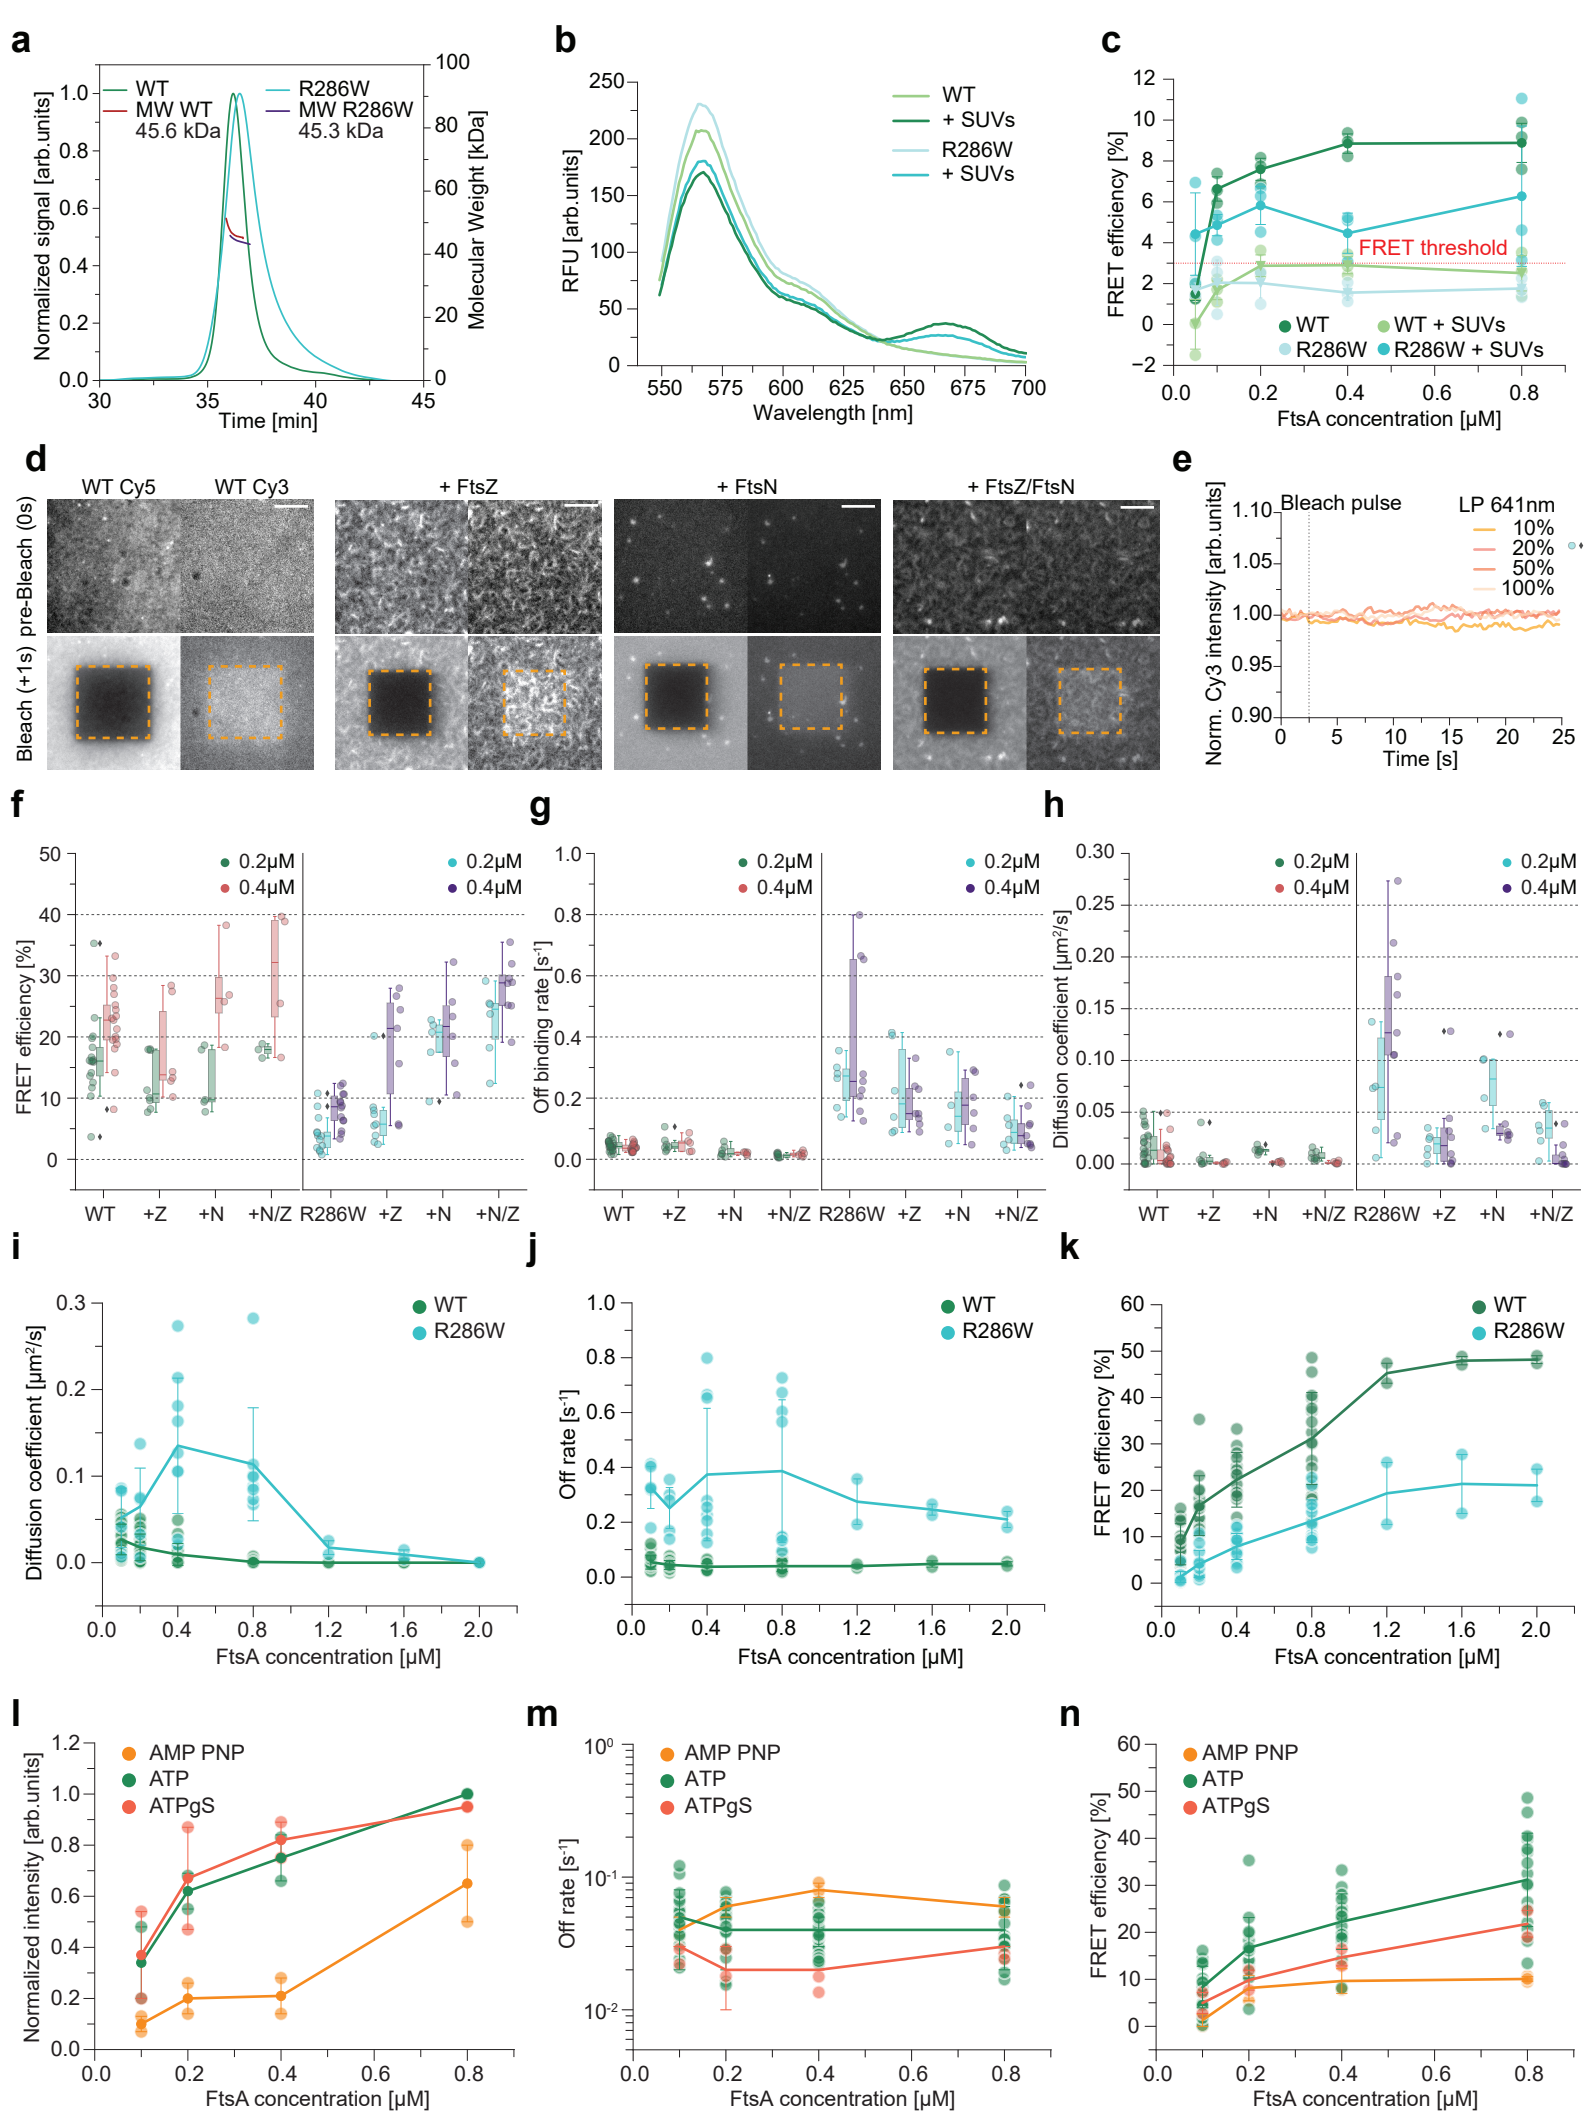

**Figure S3: FtsA WT self-interaction is membrane dependent, but does not require ATP hydrolysis**

**a**, SEC-MALLS experiments show that FtsA WT and R286W are monomers in solution. **b**, Representative spectra of cuvette-FRET measurements indicate that self-interaction of FtsA WT (green) and R286W (cyan) depends on the presence of membranes. **c**, With lipids FtsA WT exhibits stronger FRET, which is due to the lower membrane residence time and the previously proposed less ordered arrangements of FtsA R286W.  $n=3$  for each condition. **d**, Representative micrographs for acceptor photobleaching experiments of FtsA WT alone, + FtsZ, + FtsN<sub>cyto</sub> and + FtsZ/FtsN<sub>cyto</sub>. Scale bars are 5  $\mu\text{m}$ . **e**, The intensity of membrane-bound Cy3-FtsA WT is not affected by a Cy5-bleach pulse with increasing laser power (LP). **f-h**, Boxplots showing FRET efficiency (**f**), off-binding rate (**g**) and the diffusion coefficient (**h**) for better comparison of FtsA WT and FtsA R286W at 0.2 or 0.4  $\mu\text{M}$  alone. **i**, Lateral diffusion of FtsA R286W drops significantly above 0.8  $\mu\text{M}$ . The lateral mobility of R286W seems lower at low concentrations, as the fast off-binding rate dominates. **j**, The off-rate of FtsA R286W is faster than that of WT. **k**, FRET efficiency of FtsA R286W and FtsA WT saturates at concentrations above 0.8  $\mu\text{M}$ .  $n(\text{WT}) = 19/17/17/17/2/2/2$  and  $n(\text{R286W}) = 11/13/14/13/2/2/2$  for increasing FtsA concentrations. **l**, Nucleotide hydrolysis is not important for membrane binding of FtsA WT, as the protein binds to SLBs comparable in the presence of ATP and ATP $\gamma$ S. Membrane binding is decreased in the presence of AMP PNP. **m**, The off-rate of FtsA WT is similar in the presence of ATP or ATP $\gamma$ S. **n**, FRET efficiency of FtsA WT is similar in the presence of ATP or ATP $\gamma$ S. Dots in represent independent experiments, thick lines indicate the mean and error bars depict the standard deviation. The boxes indicate the 25–75th percentiles, whiskers show the maximum/minimum values within the standard deviation, the midline indicates the median value and diamonds indicate outliers. Source data are provided as a Source Data file.

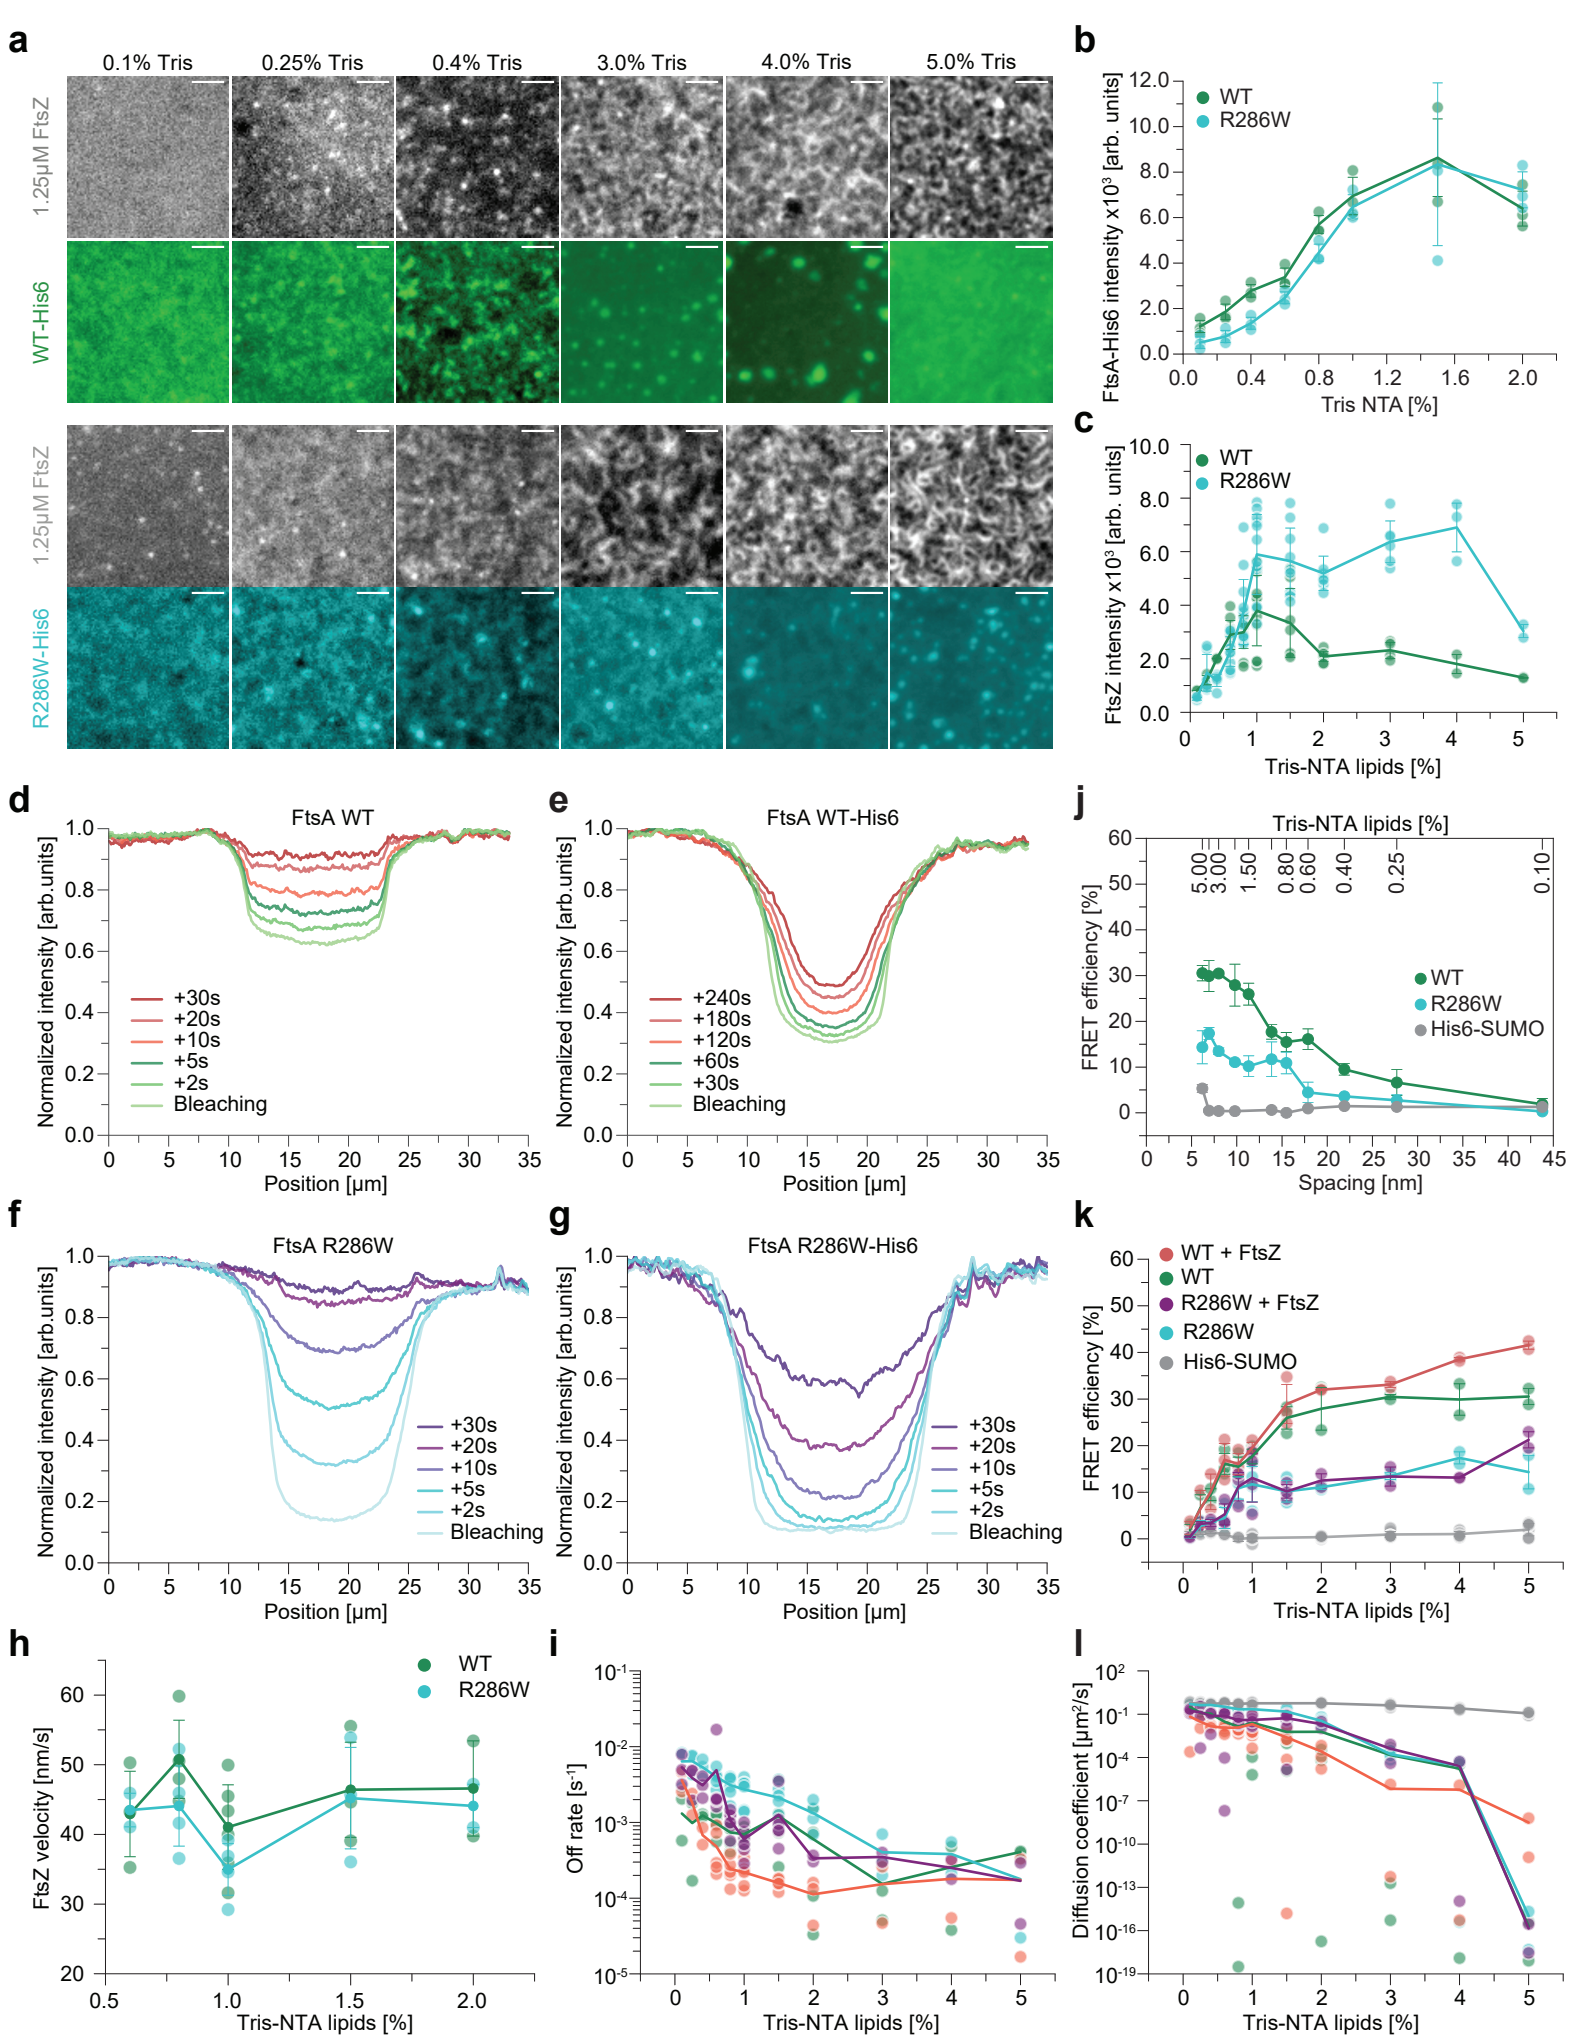

**Figure S4: FtsZ pattern forms more efficient with FtsA R286W-His6, even at high densities**

**a**, Representative micrographs of Alexa488-FtsZ (grey) and Cy5-FtsA-His6 (green) or Cy5-FtsA R286W-His6 (cyan) at Tris-NTA lipid densities not shown in **Fig 4**. FtsZ filaments form a more disrupted cytoskeletal pattern at high densities of FtsA-His6. Scale bars are 2  $\mu\text{m}$ . **b**, Using His-tagged-proteins and Tris-NTA-lipids allows to control the density of FtsA as demonstrated by increasing intensities of His-tagged FtsAs until 1.5% Tris-NTA, where saturation is reached.  $n = 3$  for each Tris-NTA lipid density. **c**, At Tris-NTA lipid densities higher than 1%, FtsA R286W-His6 is able to recruit more FtsZ filaments than FtsA-His6.  $n(\text{WT-His6}) = 2/3/3/10/11/12/7/7/4/2/2$  and  $n(\text{R286W-His6}) = 6/6/5/12/13/12/9/9/6/3/3$  for increasing Tris-NTA densities. **d-g**, Comparison of FRAP recovery profiles of native FtsAs (**d, f**) and His-tagged FtsAs (**e, g**). The recovery of the native proteins is dominated by exchange, while His-tagged proteins recover dominantly by lateral diffusion, as can be seen by the different shapes of the recovery profiles. **h**, The treadmilling speed of FtsZ is similar at different densities of FtsA-His6 or R286W-His6. **i**, As expected, off-rates of FtsA-His6 and FtsA R286W-His6 obtained from FRAP experiments are close to zero. **j**, The measured FRET of His-tagged FtsAs and the theoretical spacing is shown. Importantly FRET is already measured before the theoretical FRET border is reached (5nm), indicating active self-interaction. The His6-SUMO control only exhibits weak FRET at the maximum density. **k**, FRET efficiency of His-tagged FtsAs  $\pm$  FtsZ and His6-SUMO on membranes with up to 5% Tris-NTA lipids. **l**, Diffusion coefficient of His-tagged FtsAs  $\pm$  FtsZ and His6-SUMO on membranes with up to 5% Tris-NTA lipids ( $n=2/2/2/4/5/4/5/4/3/2/2$  for increasing Tris-NTA densities). Dots represent independent experiments, thick lines indicate the mean and error bars depict the standard deviation. Source data are provided as a Source Data file.



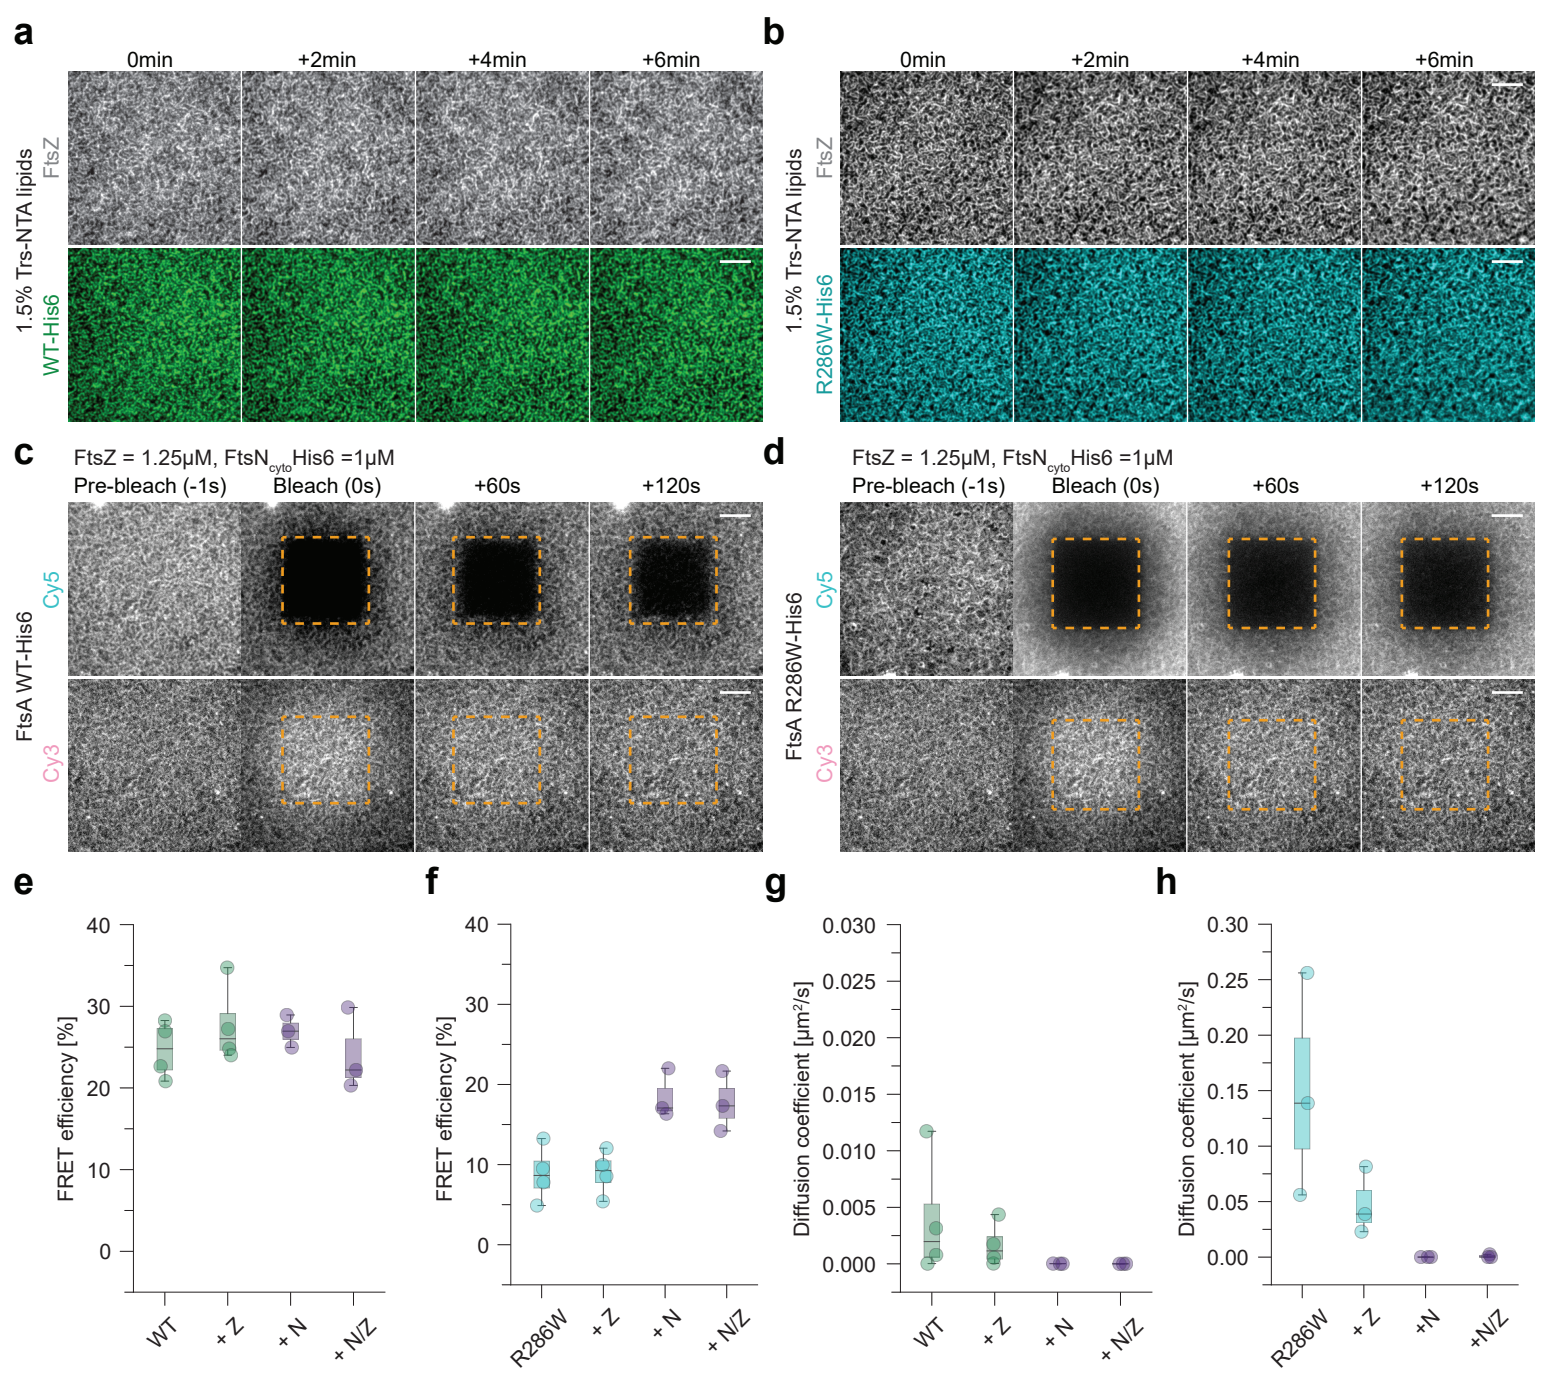

**Figure S5: FtsN<sub>cyto</sub> increases FRET of FtsA R286W-His6, and renders FtsA-His6 immobile**

**a, b**, Representative micrographs of Alexa488-FtsZ (grey) and Cy5-FtsA-His6 (green, **a**) or Cy5-FtsA R286W-His6 (cyan, **b**) in the presence of FtsN<sub>cyto</sub> on bilayers with 1.5% Tris-NTA lipids. The FtsA/FtsZ co-filaments are static, as shown by snapshots taken every two minutes in a timelapse experiment. **c, d**, Representative micrographs of acceptor bleaching recovery and donor intensity increase of FtsA-His6 (**c**) and FtsA R286W-His6 (**d**) with non-labeled FtsZ and FtsN<sub>cyto</sub>. The bleached area does not recover within 2 minutes. **e, f**, FRET of His-tagged FtsAs in the presence of FtsZ and FtsN<sub>cyto</sub>. FRET signal of FtsA-His6 remains stable in all conditions tested (**e**), while the measured FRET of FtsA R286W-His6 (**f**) increases twofold in the presence of FtsN<sub>cyto</sub>. **g, h**, The diffusion of FtsA-His6 (**g**) and FtsA R286W-His6 (**h**) and decreases drastically in the presence of FtsN<sub>cyto</sub>. Experiments with FtsAs alone and with FtsZ have been repeated four times. Experiments with FtsN<sub>cyto</sub> have been repeated three times. Scale bars are 5 μm. All experiments were performed on SLBs containing 1.5% Tris NTA lipids. Precisely defining the density of membrane-bound proteins is difficult, as His-tagged FtsAs and FtsN<sub>cyto</sub> compete for binding to Tris-NTA lipids. Dots in all plots represent independent experiments. The boxes indicate the 25–75th percentiles, whiskers show the maximum/minimum values within the standard deviation and the midline indicates the median value. Source data are provided as a Source Data file.

**Supplementary Table 1\_Summary of Statistics of Figure 3 (FRET, Off-binding, Diffusion coefficient)**

| Concentration | Condition | FtsA WT             |       |    |       |       |    |          | FtsA R286W                          |      |    |      |      |   |          | Statistics                                 |      |    |      |      |   |          |
|---------------|-----------|---------------------|-------|----|-------|-------|----|----------|-------------------------------------|------|----|------|------|---|----------|--------------------------------------------|------|----|------|------|---|----------|
|               |           | FRET Efficiency [%] |       |    |       |       |    |          | Off binding rate [s <sup>-1</sup> ] |      |    |      |      |   |          | Diffusion coefficient [μm <sup>2</sup> /s] |      |    |      |      |   |          |
|               |           | mean                | sd    | n  | mean  | sd    | n  | p-Value  | mean                                | sd   | n  | mean | sd   | n | p-Value  | mean                                       | sd   | n  | mean | sd   | n | p-Value  |
| 0.1μM         | Alone     | 8.11                | 4.43  | 19 | 1.34  | 1.19  | 11 | 3.66E-06 | 0.05                                | 0.03 | 18 | 0.33 | 0.08 | 6 | 1.73E-11 | 0.03                                       | 0.02 | 18 | 0.05 | 0.03 | 6 | 3.67E-02 |
|               | +FtsZ     | 7.85                | 3.79  | 10 | 2.26  | 0.50  | 2  | 8.64E-02 | 0.04                                | 0.01 | 8  | 0.20 | 0.13 | 4 | 8.97E-03 | 0.02                                       | 0.01 | 8  | 0.01 | 0.01 | 4 | 1.26E-01 |
|               | +FtsN     | 8.56                | 2.85  | 5  | 9.24  | 6.60  | 2  | 8.84E-01 | 0.03                                | 0.02 | 5  | 0.06 | 0.02 | 3 | 1.69E-01 | 0.02                                       | 0.01 | 5  | 0.07 | 0.10 | 3 | 3.01E-01 |
|               | +FtsN/Z   | 15.28               | 1.44  | 3  | 18.47 | 7.18  | 3  | 5.71E-01 | 0.02                                | 0.01 | 5  | 0.09 | 0.03 | 3 | 1.92E-03 | 0.01                                       | 0.01 | 5  | 0.02 | 0.01 | 3 | 1.13E-01 |
| 0.2μM         | Alone     | 16.45               | 6.33  | 17 | 4.11  | 2.88  | 13 | 7.95E-07 | 0.04                                | 0.02 | 24 | 0.25 | 0.08 | 6 | 1.44E-12 | 0.02                                       | 0.02 | 24 | 0.15 | 0.20 | 6 | 3.98E-03 |
|               | +FtsZ     | 12.58               | 4.26  | 8  | 7.16  | 5.04  | 9  | 4.09E-02 | 0.05                                | 0.03 | 7  | 0.23 | 0.14 | 6 | 1.03E-02 | 0.01                                       | 0.01 | 7  | 0.02 | 0.01 | 6 | 2.16E-01 |
|               | +FtsN     | 12.68               | 4.62  | 5  | 18.49 | 4.87  | 5  | 1.22E-01 | 0.03                                | 0.02 | 7  | 0.17 | 0.11 | 4 | 1.48E-02 | 0.01                                       | 0.00 | 7  | 0.07 | 0.03 | 4 | 5.48E-04 |
|               | +FtsN/Z   | 17.79               | 0.96  | 3  | 22.39 | 5.52  | 6  | 2.47E-01 | 0.01                                | 0.01 | 8  | 0.10 | 0.06 | 6 | 2.69E-03 | 0.01                                       | 0.00 | 8  | 0.04 | 0.02 | 6 | 3.82E-03 |
| 0.4μM         | Alone     | 22.14               | 5.74  | 17 | 8.09  | 2.79  | 14 | 6.12E-09 | 0.04                                | 0.01 | 18 | 0.37 | 0.24 | 9 | 6.73E-06 | 0.01                                       | 0.01 | 18 | 0.14 | 0.08 | 9 | 1.05E-06 |
|               | +FtsZ     | 17.74               | 7.31  | 6  | 18.19 | 8.78  | 7  | 9.28E-01 | 0.05                                | 0.02 | 5  | 0.18 | 0.07 | 8 | 5.48E-03 | 0.00                                       | 0.00 | 5  | 0.03 | 0.04 | 8 | 1.56E-01 |
|               | +FtsN     | 27.29               | 7.13  | 4  | 21.27 | 6.98  | 6  | 2.70E-01 | 0.02                                | 0.00 | 5  | 0.18 | 0.09 | 6 | 5.78E-03 | 0.00                                       | 0.00 | 5  | 0.05 | 0.04 | 6 | 3.55E-02 |
|               | +FtsN/Z   | 30.17               | 9.64  | 4  | 28.01 | 4.62  | 8  | 6.43E-01 | 0.02                                | 0.01 | 6  | 0.10 | 0.07 | 9 | 1.22E-02 | 0.00                                       | 0.00 | 6  | 0.01 | 0.01 | 9 | 2.49E-01 |
| 0.8μM         | Alone     | 30.63               | 9.86  | 17 | 13.36 | 4.59  | 13 | 1.81E-03 | 0.04                                | 0.02 | 19 | 0.39 | 0.26 | 8 | 9.58E-03 | 0.00                                       | 0.00 | 19 | 0.11 | 0.07 | 8 | 2.57E-03 |
|               | +FtsZ     | 27.13               | 11.27 | 5  | 23.78 | 11.49 | 7  | 6.57E-01 | 0.06                                | 0.02 | 3  | 0.16 | 0.07 | 8 | 4.84E-02 | 0.00                                       | 0.00 | 3  | 0.02 | 0.01 | 8 | 2.32E-02 |
|               | +FtsN     | 29.89               | 5.76  | 6  | 21.21 | 5.65  | 4  | 6.85E-02 | 0.03                                | 0.01 | 4  | 0.19 | 0.13 | 3 | 9.35E-02 | 0.00                                       | 0.00 | 4  | 0.04 | 0.02 | 3 | 1.02E-01 |
|               | +FtsN/Z   | 34.22               | 1.13  | 3  | 30.62 | 5.58  | 6  | 3.62E-01 | 0.03                                | 0.01 | 5  | 0.09 | 0.07 | 4 | 1.20E-01 | 0.00                                       | 0.00 | 5  | 0.01 | 0.00 | 4 | 1.14E-01 |

**Supplementary Table 2\_Reagents and Chemicals**

| <b>Strain, Reagent or Resource</b>                               | <b>Source</b>                | <b>Identifier</b> |
|------------------------------------------------------------------|------------------------------|-------------------|
| <b><i>E. coli</i> strains</b>                                    |                              |                   |
| BL21 (DE3)                                                       |                              | C2527             |
| DH5 $\alpha$                                                     |                              | 18265017          |
| <b>Chemicals</b>                                                 |                              |                   |
| cOmplete™, EDTA-free Protease Inhibitor Cocktail                 | Roche Molecular Biochemicals | 5056489001        |
| DNase                                                            | ThermoFisher Scientific      | 90083             |
| Potassium Chloride                                               | Sigma-Aldrich                | 60130-1KG         |
| Glycerol                                                         | Sigma-Aldrich                | G5516             |
| IPTG                                                             | Bartelt                      | 6.259 683         |
| Imidazole                                                        | Sigma-Aldrich                | I2399             |
| DTT, 1,4-Dithiothreitol                                          | Sigma-Aldrich                | 10708984001       |
| (4-(2-hydroxyethyl)-1-piperazineethanesulfonic acid) (HEPES)     | Sigma-Aldrich                | H3375-25G         |
| Piperazine-N,N-bis(2-ethanesulphonic acid) (PIPES)               | Sigma-Aldrich                | P6757             |
| d-Desthiobiotin                                                  | Sigma-Aldrich                | D1411             |
| Strep-Tactin® Sepharose® resin                                   | IBA-lifesciences             | 2-1201-002        |
| HisPur Ni-NTA Resin; Thermo Fisher Scientific                    | ThermoFisher Scientific      | 88221             |
| InstantBlue® Coomassie Protein Stain                             | abcam                        | ab119211          |
| Hydrogen Peroxide H <sub>2</sub> O <sub>2</sub>                  | Sigma-Aldrich                | 216763            |
| Sulfuric acid H <sub>2</sub> SO <sub>4</sub> 95-97%              | Sigma-Aldrich                | 1007311000        |
| $\beta$ -mercaptoethanol                                         | Sigma-Aldrich                | M6250             |
| HisPur™ Ni-NTA resin                                             | ThermoFisher Scientific      | 88221             |
| 7M Sortase                                                       | Addgene                      | Plasmid #51141    |
| Tris(2-carboxyethyl)phosphine hydrochloride (TCEP)               | Sigma-Aldrich                | C4706             |
| Protino Ni-TED resin                                             | Lactan (Macherey Nagel)      | 74520030          |
| Vivaspin 2 and 20 centrifugal concentrators 5-kDa                | Sigma-Aldrich (Sartorius)    | Z614181, Z614599  |
| Catalase                                                         | Sigma Aldrich                | C40               |
| Glucose                                                          | Sigma Aldrich                | G8270-1kg         |
| GTP                                                              | ThermoFisher Scientific      | R0461             |
| ATP                                                              | ThermoFisher Scientific      | R0441             |
| Trolox (6-Hydroxy-2,5,7,8-tetramethylchromane-2-carboxylic acid) | Sigma Aldrich                | 238813            |
| Glucose Oxidase                                                  | AL-Labortechnik (SERVA)      | 22778.01          |
| <b>Lipids</b>                                                    |                              |                   |
| DOPC (1,2 dioleoyl-sn-glycero-3-phosphocholine)                  | Avanti Polar Lipids          | 850375C           |
| DOPG (1,2-dioleoyl-sn-glycero-3-phospho-(1'-rac-glycerol))       | Avanti Polar Lipids          | 840475C           |
| Tris-DODA-NTA                                                    | ApexMolecular                | Custom            |

|                                                                                                           |                         |                                                                     |
|-----------------------------------------------------------------------------------------------------------|-------------------------|---------------------------------------------------------------------|
| DOPE-Rhodamine (1,2-dioleoyl- <i>sn</i> -glycero-3-phosphoethanolamine-N-(lissamine rhodamine B sulfonyl) | Avanti Polar Lipids     | 810150C                                                             |
| <b>Peptides</b>                                                                                           |                         |                                                                     |
| FtsN <sub>cyto</sub> His6                                                                                 | Biomatik                | See Supplementary Table 3                                           |
| FtsZ C-terminal peptide                                                                                   | Biomatik                | See Supplementary Table 3                                           |
| FtsZ C-terminal peptide - TAMRA                                                                           | Biomatik                | See Supplementary Table 3                                           |
| CLPETGG                                                                                                   | Biomatik                | See Supplementary Table 3                                           |
| <b>Other</b>                                                                                              |                         |                                                                     |
| Pierce™ BCA Protein Assay Kit                                                                             | ThermoFisher Scientific | 23227                                                               |
| Pierce™ Coomassie (Bradford) Protein Assay Kit                                                            | ThermoFisher Scientific | 23200                                                               |
| PD10 desalting column                                                                                     | Sigma Aldrich           | GE17-0851-01I                                                       |
| QCM-D sensor                                                                                              | Biolin Scientific       | QSX303                                                              |
| Precision cover glasses thickness No. 1.5H, 24 x 50 mm                                                    | VWR (Marienfeld)        | 107222                                                              |
| Norland Optical Adhesive 63, 1OZ.                                                                         | APM Technica            | 284239                                                              |
| HiLoad 26/600 Superdex 200 Prep Grade                                                                     | GE Healthcare           | 28-9893-36                                                          |
| Superdex 200 Increase 10/300 GL                                                                           | GE Healthcare           | 28-9909-44                                                          |
| Monolith NT.115 Premium Capillaries                                                                       | Nanotemper              | MO-K025                                                             |
| Hellma® fluorescence cuvettes, ultra Micro                                                                | Sigma Aldrich           | Z802549-1EA                                                         |
| Spectrophotometer Spectramax M2e Plate- + Cuvette Reader                                                  | Molecular Devices       |                                                                     |
| <b>Dyes</b>                                                                                               |                         |                                                                     |
| Sulfo-Cyanine-5-maleimide                                                                                 | Lumiprobe               | 23380                                                               |
| Sulfo-Cyanine-3-maleimide                                                                                 | Lumiprobe               | 21380                                                               |
| Alexa Fluor® 488 C5 Maleimide                                                                             | ThermoFisher Scientific | A10254                                                              |
| <b>Software and algorithms</b>                                                                            |                         |                                                                     |
| Fiji/ImageJ                                                                                               |                         | <a href="https://fiji.sc">https://fiji.sc</a>                       |
| Python (Jupyter Notebook/Spyder)                                                                          |                         | <a href="https://www.anaconda.com/">https://www.anaconda.com/</a>   |
| Astra Software (SEC-MALS)                                                                                 |                         | <a href="https://www.wyatt.com">https://www.wyatt.com</a>           |
| MO. Affinity Analysis Software                                                                            |                         | <a href="https://nanotempertech.com">https://nanotempertech.com</a> |

### ***Supplementary Table 3\_Peptide Sequences & Protein Parameters***

| <b>Peptide</b>                | <b>Sequence</b>                        | <b>MW [Da]</b> |
|-------------------------------|----------------------------------------|----------------|
| FtsNcyto-His6                 | CMAQRDYVRRSQPAPSRRKSTSRKKQRNLPAVHHHHHH | 4723.2         |
| FtsZ C-terminal peptide       | Ac-KEPDYLDIPAFLRKQAD-NH2               | 2060.5         |
| FtsZ C-terminal peptide TAMRA | 5-TAMRA-KEPDYLDIPAFLRKQAD-NH2          | 2430.75        |
| CLEPTGG for sortagging        | CLEPTGG                                | 675.75         |

| <b>Protein</b> | <b>MW [Da]</b> | <b>Width</b> | <b>Length</b> | <b>pI</b> |
|----------------|----------------|--------------|---------------|-----------|
| FtsZ           | 45329.97       | ~5nm         | ~7nm          | 5.84      |
| FtsA WT        | 45359.99       | ~5nm         | ~7nm          | 5.75      |
| FtsA R286W     | 40192.72       | ~4nm         | ~6nm          | 4.63      |
